# Supplementary material for: Quantifying the Importance of Vehicle Ammonia Emissions in an Urban Area of the Northeastern US Utilizing Nitrogen Isotopes
Source: Copernicus journal article supplement (doi:10.5194/acp-2022-419), 2022-06-24
Supplement: Supplementary file 1 [file acp-2022-419-supplement.pdf]

Supplement of

# Quantifying the Importance of Vehicle Ammonia Emissions in an Urban Area of the Northeastern US Utilizing Nitrogen Isotopes

Walters et al.

Correspondence to: Wendell W. Walters (wendell\_walters@brown.edu)

## Table of Contents:

|                                                                                                    |       |
|----------------------------------------------------------------------------------------------------|-------|
| <b>Figure S1.</b> Correlogram of measured parameters.....                                          | S1    |
| <b>Figure S2.</b> Seasonal $\Delta\delta^{15}\text{N}$ Data .....                                  | S2    |
| <b>Figure S3.</b> Spatiotemporal ground-based $\text{NH}_3$ and $\text{pNH}_4^+$ Observations..... | S3    |
| <b>Figure S4.</b> Mixing model distributions .....                                                 | S4    |
| <b>Text S1.</b> Rationale of $\delta^{15}\text{N}(\text{NH}_3)$ source values .....                | S5-S6 |
| <b>References</b> .....                                                                            | S6    |

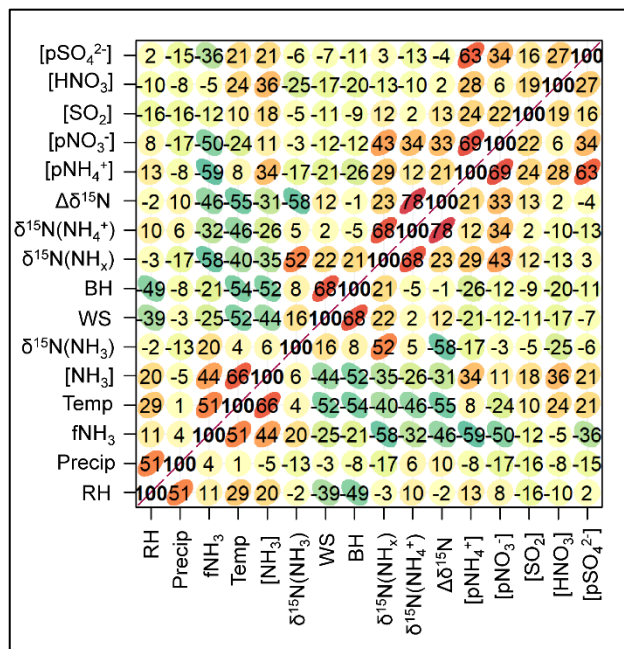

**Figure S1.** Correlogram of the various meteorological parameters (i.e., Temperature (Temp), relative humidity (RH), wind direction (WD), and precipitation (Precip), boundary height (BH)), gas, particle, and nitrogen isotope data at Providence, RI.

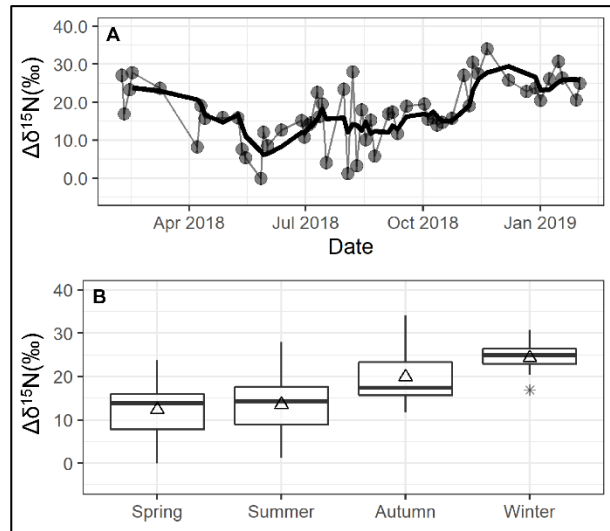

**Figure S2.** Seasonal  $\Delta\delta^{15}\text{N}$  data at the Providence, RI monitoring site. In (A), the light data points and lines represent the observations, and the thick lines are four-point (~2 weeks) moving averages. (B) shows box and whiskers plot summarizing the seasonal distributions (lower extreme, lower quartile, median, upper quartile, and upper extreme) with the mean (open triangle) and outlier (black asterisk).

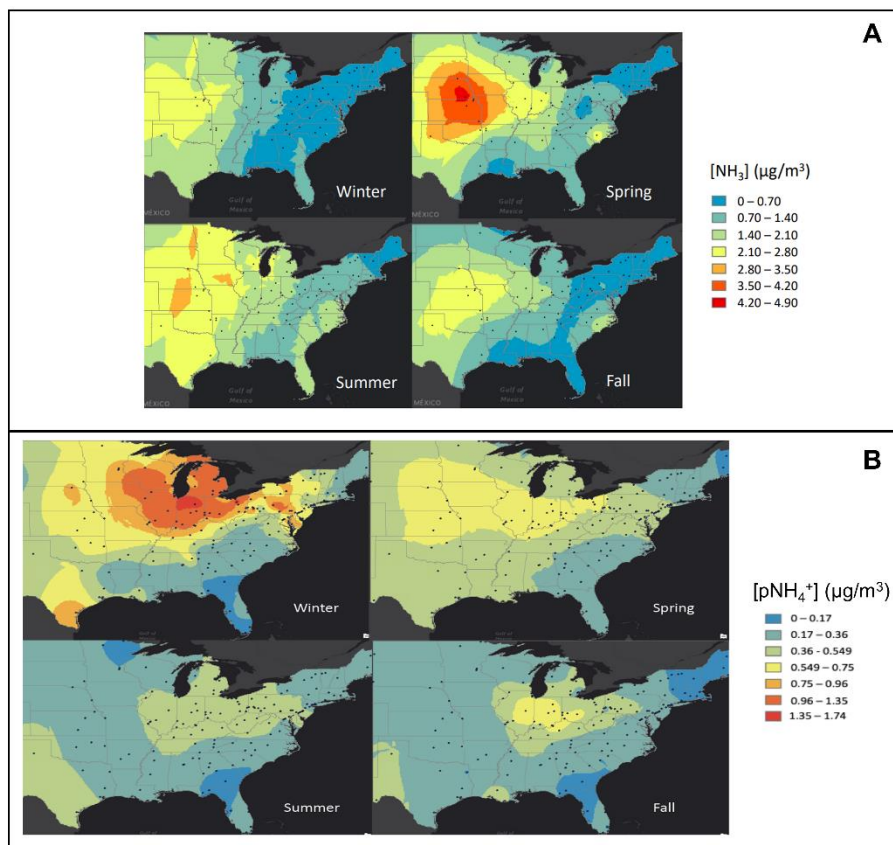

**Figure S3.** Spatiotemporal overview of (A) [NH<sub>3</sub>] and (B) [pNH<sub>4</sub><sup>+</sup>] across the eastern half of the contiguous US for winter (DJF), spring (MAM), summer (JJA), and fall (SON) for 2018. The data points correspond to Ammonia Monitoring Network (AMoN; n= 103) for [NH<sub>3</sub>] and either Chemical Speciation Network (CSN; n =104) or Clean Air Status and Trends Network (CASTNET; n=66) for [pNH<sub>4</sub><sup>+</sup>]. The seasonal means were respectively interpolated utilizing the Kriging method, converted to raster output, and cropped to the confines of the United States to improve the data visualization.

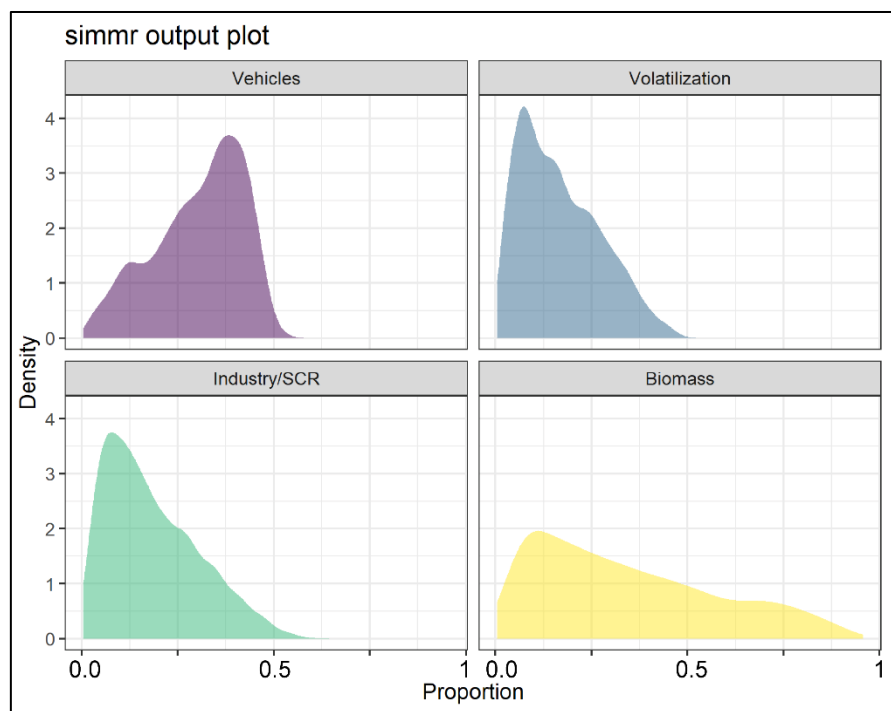

**Figure S4.** Calculated distributions of the fractional contribution of the important urban NH<sub>3</sub> sources utilizing a stable isotope mixing model (SIMMR) for Providence, RI.

### **Text S1: $\delta^{15}\text{N}(\text{NH}_3)$ Emission Source Values:**

The collection technique, either passive or active, can have been shown to have a strong influence on  $\delta^{15}\text{N}(\text{NH}_3)$  quantification. Recently, passive sampling techniques have resulted in a bias of  $\sim -15.5\%$  relative to active sampling techniques near emission sources and background ambient air studies due to a hypothesized diffusion isotope effect associated with passive collection of  $\text{NH}_3$  (Walters et al., 2020; Pan et al., 2020). We note that the bias associated with passive  $\delta^{15}\text{N}(\text{NH}_3)$  characterization may be able to be accounted for in the future, but we still do not know if the observed  $\sim -15.5\%$  bias is consistent across all sampling conditions (e.g., temperature, relative humidity,  $\text{NH}_3$  collection amounts). Thus, while the vast majority of  $\text{NH}_3$  source characterization studies have utilized passive collection techniques, we have selected  $\delta^{15}\text{N}(\text{NH}_3)$  source values obtained using active sampling techniques since these values should be more accurate than the value obtained using passive sampling. Below we discuss our reasoning behind the choice of these values.

**Significant  $\text{NH}_3$  Emission Sources:** Based on a combination of local wind analysis, air mass back trajectory analysis, National Emission Inventory data, we found evidence for significant  $\text{NH}_3$  emission contributions from vehicles,  $\text{NH}_3$  volatilization, industry, fuel combustion, and biomass burning. We acknowledge that additional miscellaneous  $\text{NH}_3$  sources exist in an urban environment, including pets, household products, and humans; however, we assumed that these sources were negligible compared to the three main identified emission sources. Thus, we conduct isotope mixing analysis using vehicles,  $\text{NH}_3$  volatilization, industry, fuel combustion, and biomass burning as major contributing emission sources as an *a priori*.

**Vehicles.** The vehicle  $\delta^{15}\text{N}(\text{NH}_3)$  signature was defined as  $6.6 \pm 2.1\%$ , deriving from an extensive study of near-highway stationary measurements in Providence, RI, mobile on-road measurements in the Northeastern US, and stationary monitoring measurements in Shenyang China (Walters et al., 2020). While there was evidence for significant spatiotemporal  $\delta^{15}\text{N}(\text{NH}_3)$  variabilities due to differences in fuel type (i.e., gasoline vs. diesel), the chosen emission signature of  $6.6 \pm 2.1\%$  was representative of vehicle plumes with a fleet composition typical of urban regions that are dominated by gasoline vehicles. This value is also near a recent study of vehicle plume measurements utilizing an active sampling filter-based collection system in Shenyang, China of  $6.3 \pm 1.6\%$  (Song et al., 2021). Overall, the vehicle  $\delta^{15}\text{N}(\text{NH}_3)$  emission signature is well-constrained and will enable tracking of urban vehicle  $\text{NH}_3$  emission contributions.

**$\text{NH}_3$  Volatilization.** The volatilization of  $\text{NH}_3$  from livestock waste and fertilizer application has been the subject of numerous studies (Heaton, 1987; Freyer, 1978; Felix et al., 2013; Hristov et al., 2011; Frank et al., 2004; Chang et al., 2016), which has demonstrated a large range of  $\delta^{15}\text{N}(\text{NH}_3)$  values reflecting a process-driven  $\delta^{15}\text{N}$  effect as  $\text{NH}_3$  volatilization tends to result in a gradual increase in  $\delta^{15}\text{N}$ . For example,  $\delta^{15}\text{N}(\text{NH}_3)$  from dairy manure was reported to range from  $-31$  to  $-15\%$  over a period of  $\sim 2$  weeks that increased with N loss (Hristov et al., 2011). This effect occurs due to the kinetic isotopic fractionation favoring the initial release of  $^{14}\text{NH}_3$ , leading to low  $\delta^{15}\text{N}(\text{NH}_3)$  values. As  $\text{NH}_3$  is lost, the nitrogen content of volatilized material (urea or  $\text{NH}_4^+$ ) is enriched in  $^{15}\text{N}$ , increasing the emitted  $\delta^{15}\text{N}(\text{NH}_3)$  value. The process-driven  $\delta^{15}\text{N}$  effect is associated with  $\text{NH}_3$  volatilization and the large reported range of  $\delta^{15}\text{N}(\text{NH}_3)$  values. Here we define the  $\delta^{15}\text{N}(\text{NH}_3)$  emission signature as  $-19.2 \pm 8.3\%$ , which represents an average of field

measurements in cow and shed sheds, reflecting an integrated measurement of NH<sub>3</sub> volatilization, and process-driven  $\delta^{15}\text{N}(\text{NH}_3)$  from volatilization studies (Frank et al., 2004; Hristov et al., 2011).

**Industry/Fuel Combustion.** Most point emission sources in Providence, RI derive from stationary fuel combustion (i.e., electricity generation at power plants or institutions (i.e., school, hospital, prison)) or industrial emissions. However, our knowledge of  $\delta^{15}\text{N}(\text{NH}_3)$  emission signatures from direct fuel combustion and industrial emissions is limited. Previous NH<sub>3</sub> capture from direct flue emissions from coal-fired power plant emissions equipped with selective catalytic reduction (SCR) technology reported  $\delta^{15}\text{N}(\text{NH}_3)$  values of -11.3‰ and -14.6‰ (Felix et al., 2013). This value is suspected to reflect the strong contribution of NH<sub>3</sub> slip from the SCR technology as the measured values were much lower than previous reports of NH<sub>3</sub> emitted from the combustion of brown and hard coal with values of -6.9‰, -4.3‰, and -7.2‰ (Freyer, 1978), in which NH<sub>3</sub> derives mainly from the nitrogen contained within the coal. New England fossil-fuel combustion mainly derives from oil and natural gas, such that the previously reported SCR  $\delta^{15}\text{N}(\text{NH}_3)$  values may closer represent the emission signature of stationary fuel combustion of this region. Direct NH<sub>3</sub> emissions from industrial activities have only been reported from a steel factory with a  $\delta^{15}\text{N}(\text{NH}_3)$  value of -20.1‰ (Heaton, 1987). Still, it remains unclear whether this value is representative of all industry-related NH<sub>3</sub> emissions. A sector-based sampling of ambient NH<sub>3</sub> downwind from chemical and metal industries in Canada have reported an average of -15.1‰ (14), which supports that industrial emissions tend to have a low  $\delta^{15}\text{N}(\text{NH}_3)$  value consistent with the one available direct industrial emission  $\delta^{15}\text{N}(\text{NH}_3)$  signature. Overall, due to some of the uncertainties and overlap with the available data for stationary fuel combustion and industrial emissions, we chose a  $\delta^{15}\text{N}(\text{NH}_3)$  signature for this combination of emission sectors to be  $-15.3 \pm 3.6\text{‰}$ , which represents the average of the available direct measurements of power plants with SCR technology and industrial emissions (Heaton, 1987; Felix et al., 2013).

**Biomass Burning.** The  $\delta^{15}\text{N}(\text{NH}_3)$  signature from direct biomass burning and wildfire emissions utilizing active sampling techniques currently does not exist. We have defined the biomass burning value as  $-6.1 \pm 1.3\text{‰}$ , representing the average of direct emission measurements from the combustion of brown and hard coal (Freyer, 1978), in which NH<sub>3</sub> derives mainly from the nitrogen contained within the coal.

## References

Chang, Y., Liu, X., Deng, C., Dore, A. J., and Zhuang, G.: Source apportionment of atmospheric ammonia before, during, and after the 2014 APEC summit in Beijing using stable nitrogen isotope signatures, *Atmospheric Chem. Phys.*, 16, 11635–11647, 2016.

Felix, D. J., Elliott, E. M., Gish, T. J., McConnell, L. L., and Shaw, S. L.: Characterizing the isotopic composition of atmospheric ammonia emission sources using passive samplers and a combined oxidation-bacterial denitrifier approach, *Rapid Commun. Mass Spectrom.*, 27, 2239–2246, 2013.

Frank, D. A., Evans, R. D., and Tracy, B. F.: The role of ammonia volatilization in controlling the natural  $^{15}\text{N}$  abundance of a grazed grassland, *Biogeochemistry*, 68, 169–178, 2004.

Freyer, H. D.: Seasonal trends of  $\text{NH}_4^+$  and  $\text{NO}_3^-$  nitrogen isotope composition in rain collected at Jülich, Germany, *Tellus*, 30, 83–92, 1978.

Heaton, T. H. E.:  $^{15}\text{N}/^{14}\text{N}$  ratios of nitrate and ammonium in rain at Pretoria, South Africa, *Atmospheric Environ.* 1967, 21, 843–852, 1987.

Hristov, A. N., Hanigan, M., Cole, A., Todd, R., McAllister, T. A., Ndegwa, P. M., and Rotz, A.: Ammonia emissions from dairy farms and beef feedlots, *Can. J. Anim. Sci.*, 91, 1–35, 2011.

Pan, Y., Gu, M., Song, L., Tian, S., Wu, D., Walters, W. W., Yu, X., Lü, X., Ni, X., and Wang, Y.: Systematic low bias of passive samplers in characterizing nitrogen isotopic composition of atmospheric ammonia, *Atmospheric Res.*, 105018, 2020.

Song, L., Walters, W. W., Pan, Y., Li, Z., Gu, M., Duan, Y., Lü, X., and Fang, Y.:  $^{15}\text{N}$  natural abundance of vehicular exhaust ammonia, quantified by active sampling techniques, *Atmos. Environ.*, 255, 118430, 2021.

Walters, W. W., Song, L., Chai, J., Fang, Y., Colombi, N., and Hastings, M. G.: Characterizing the spatiotemporal nitrogen stable isotopic composition of ammonia in vehicle plumes, *Atmospheric Chem. Phys.*, 20, 11551–11567, 2020.
